# Supplementary material for: P2X7 receptor antagonists modulate experimental autoimmune neuritis via regulation of NLRP3 inflammasome activation and Th17 and Th1 cell differentiation
Source: J Neuroinflammation. 2024 Mar 25;21:73. doi: 10.1186/s12974-024-03057-z (PMC10964508; doi:10.1186/s12974-024-03057-z)
Supplement: Supplementary file 2 — Supplementary Material 2 [file 12974_2024_3057_MOESM2_ESM.docx]

**Supplementary material**

**P2X7 receptor antagonists modulate experimental autoimmune neuritis via regulation of NLRP3 inflammasome activation and Th17 and Th1 cell differentiation**

Yuhan Xie1**#**, Ranran Han2**#**, Yulin Li2**#**, Weiya Li1**#**, Shichao Zhang3, Yu Wu1, Yuexin Zhao2, Rongrong Liu2, Jie Wu2, Wei Jiang2,4*, Xiuju Chen1*

1Department of Neurology, Nankai Hospital, Tianjin Medical University, Tianjin, 300052, China

2Department of Neurology, Tianjin Neurological Institute, Tianjin Medical University General Hospital, Tianjin, 300052, China

3Department of Interventional Radiology, Zhongshan Hospital of Xiamen University, School of Medicine, Xiamen University, Xiamen 361102, China

4Department of Radiology, The Third Affiliated Hospital of Zhengzhou University, Zhengzhou, Henan, China.

**#**Y.H.X., R.R.H, Y.L.L. and W.Y.L contributed equally to this work.

*Corresponding author: Prof. Wei Jiang, Email: jiangwei.med@gmail.com

Prof. Xiuju Chen, Email: chyjutj@163.com

**Table S1 Demographics of patients with GBS and healthy controls**

| Characteristic | Real-time quantitative PCR of P2X7R expression | | Flow cytometry | |
| --- | --- | --- | --- | --- |
| HCs  (n=8) | GBS  (n=8) | HCs  (n=7) | GBS  (n=7) |
| Male | 2 | 2 | 2 | 2 |
| Age, median (IQR) | 52 (33-59.5) | 53 (30.3-57.3) | 55 (34-67) | 55 (39-64) |
| Disability score at randomisation | | | | |
| Score=3 | n/a | 5 (62.5%) | n/a | 5 (71.4%) |
| Score=4 | n/a | 2 (25.0%) | n/a | 2 (28.6%) |
| Score=5 | n/a | 1 (12.5%) | n/a | 0 (0%) |
| Diarrhoea | n/a | 1 (12.5%) | n/a | 0 (0%) |
| Respiratory tract infection n/a | | 4 (50.0%) | n/a | 4 (57.1%) |

Data are n (%) unless indicated otherwise. All percentages were calculated for patients with available data. HCs, healthy controls; GBS, Guillain–Barre Syndrome.

**Table S2 The primer sequences**

| Gene | | Organism | FORWARD | REVERSE |
| --- | --- | --- | --- | --- |
| IL-17 | | Rat | TGGACTCTGAGCCGCATTGA | GACGCATGGCGGACAATAGA |
| IL-2 | Rat | | CCAAGCAGGCCACAGAATTG | TCCAGCGTCTTCCAAGTGAA |
| TNF-α | Rat | | ATGGGCTCCCTCTCATCAGT | GCTTGGTGGTTTGCTACGAC |
| IFN-γ | Rat | | AGGAACTGGCAAAAGGACGG | TCAGGTGCGATTCGATGACA |
| β-actin | Rat | | ACACCCGCCACCAGTTCG | CCCACGATGGAGGGGAAGAC |
| P2X7R | Homo sapiens | | GACTTCCTCATCGACACTTACTC | TCTTCCTGTAGTAGTATTCGTTGAC |
| β-actin | Homo sapiens | | CATGTACGTTGCTATCCAGGC | CTCCTTAATGTCACGCACGAT |


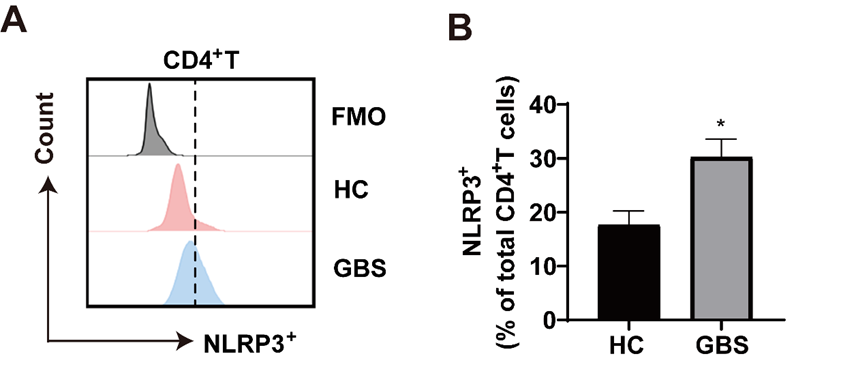


**Figure S1:** NLRP3 expression was examined using flow cytometry. **(A)** Proportions of NLRP3 on CD4+ T cells in PBMCs collected from GBS patients and healthy controls. **(B)** Enhanced expression of NLRP3 in CD4+ T cells in the peripheral blood collected from GBS patients (n=7 per group). HC, healthy control; GBS, Guillain–Barre Syndrome. **P*<0.05, ***p*<0.01.


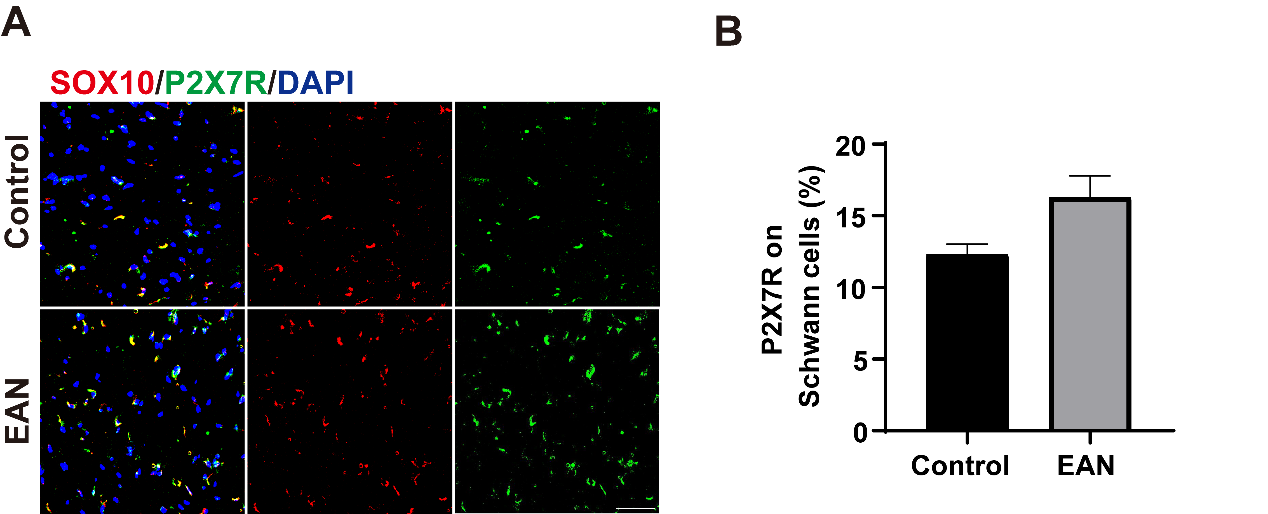


**Figure S2:** The expression of P2X7R in Schwann cells. **(A, B)** Immunofluorescence photomicrographs and quantification of P2X7R expression on Schwann cells (SOX10) in the sciatic nerves of EAN and control (unimmunized group) rats (p=0.0649, Mann–Whitney U test). Scale bars, 20μm.


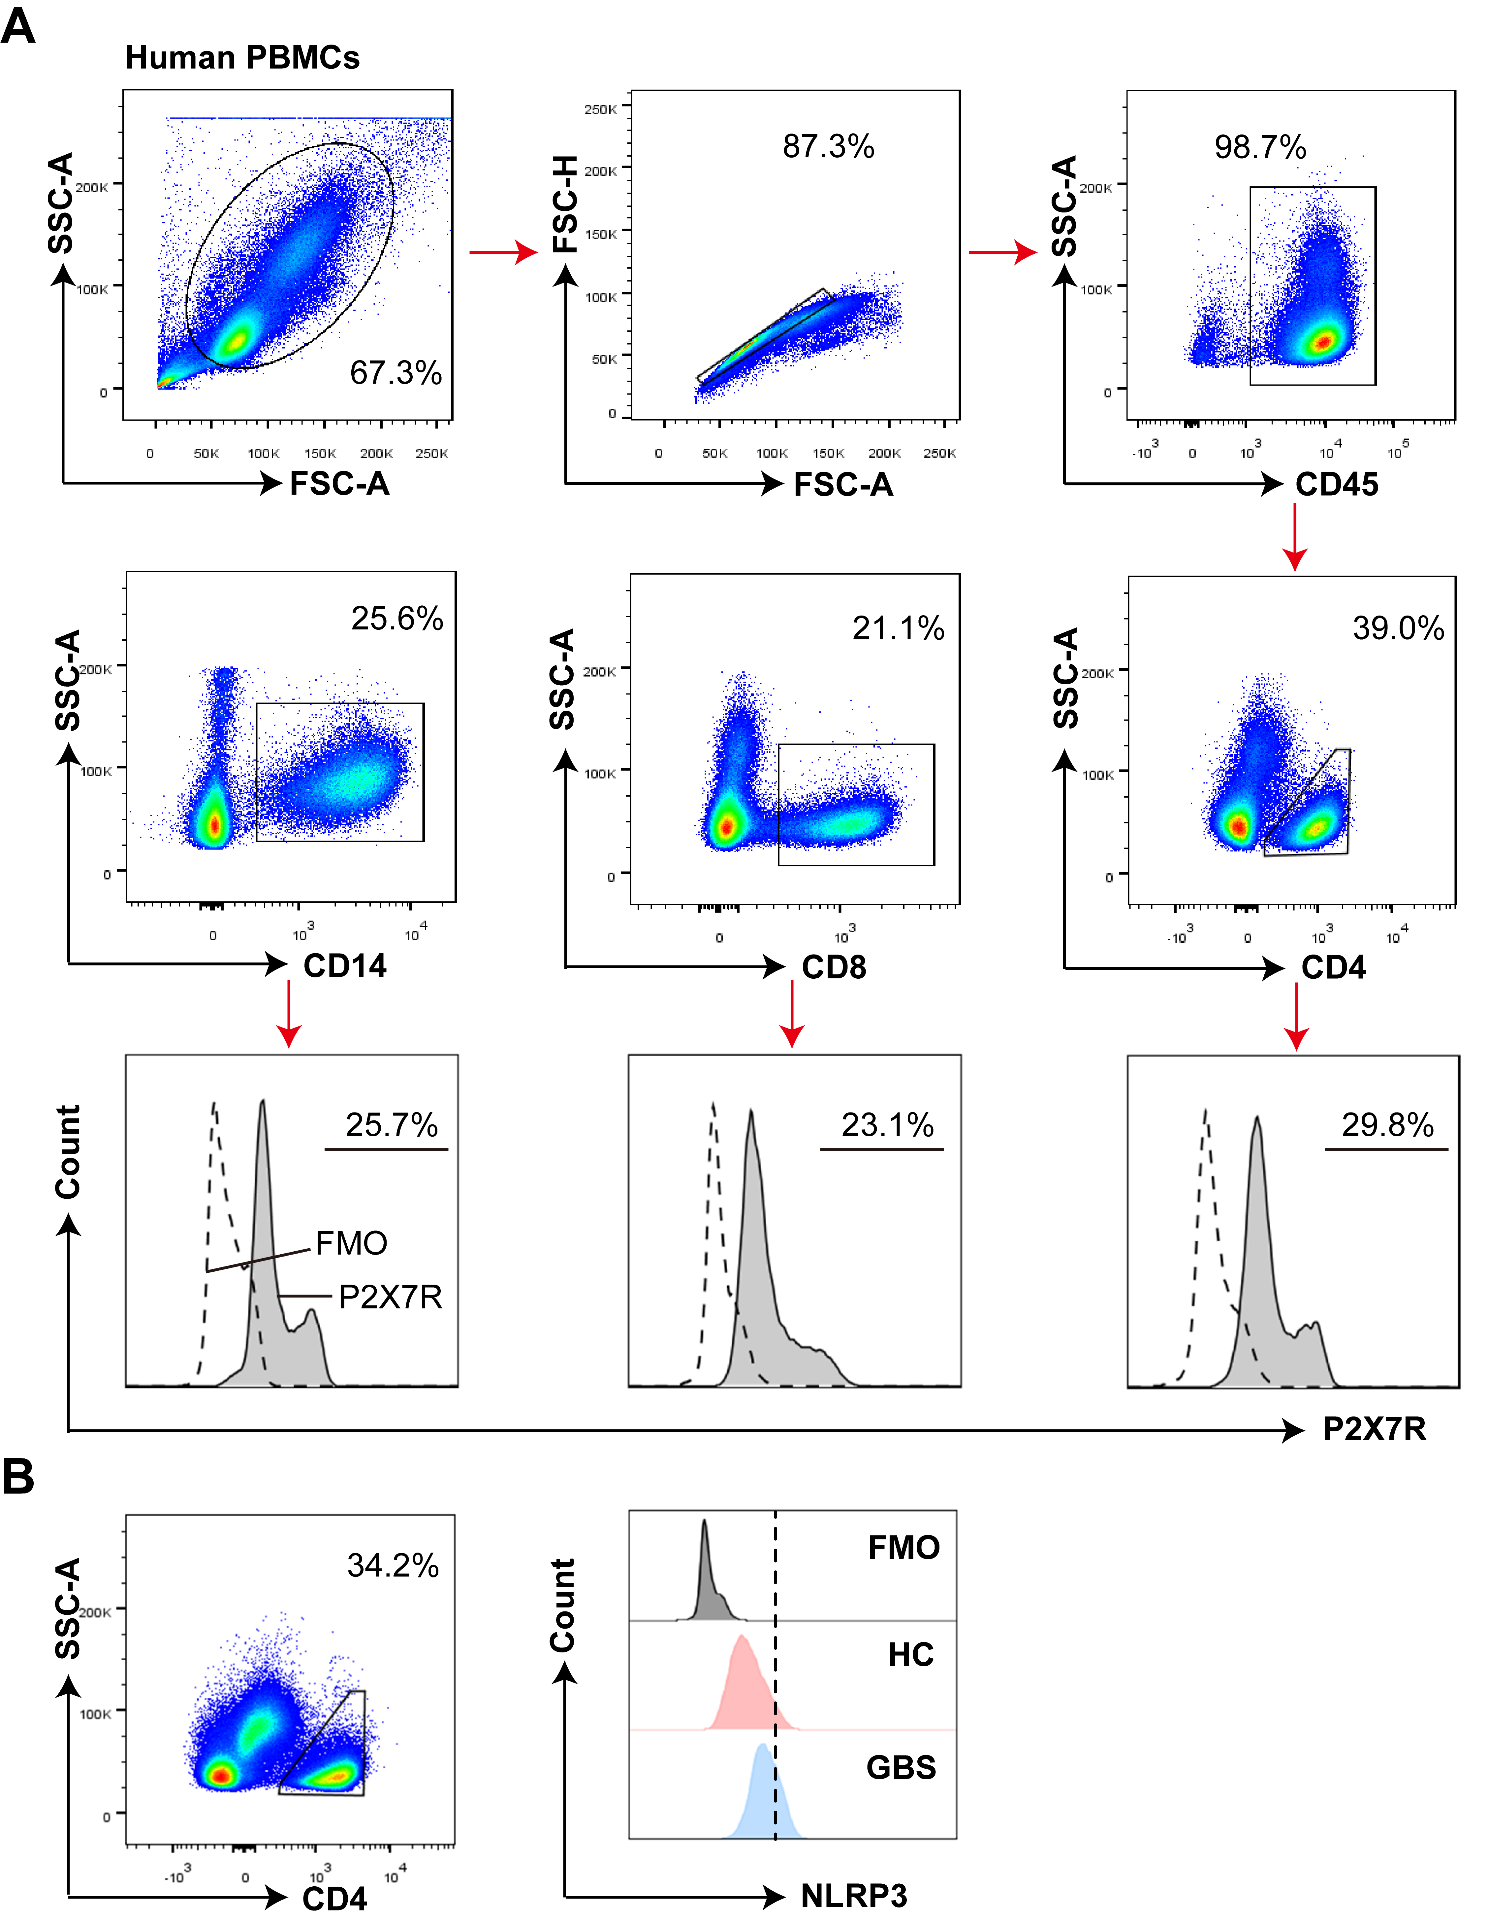


**Figure S3: (A)** Gating strategy of P2X7R in CD4+ T cells, CD8+ T cells and monocytes in PBMCs by flow cytometry. **(B)** Gating strategy of NLRP3 in CD4+ T cells in PBMCs by flow cytometry. A total of 3*105 cells were measured in each sample using flow cytometry.


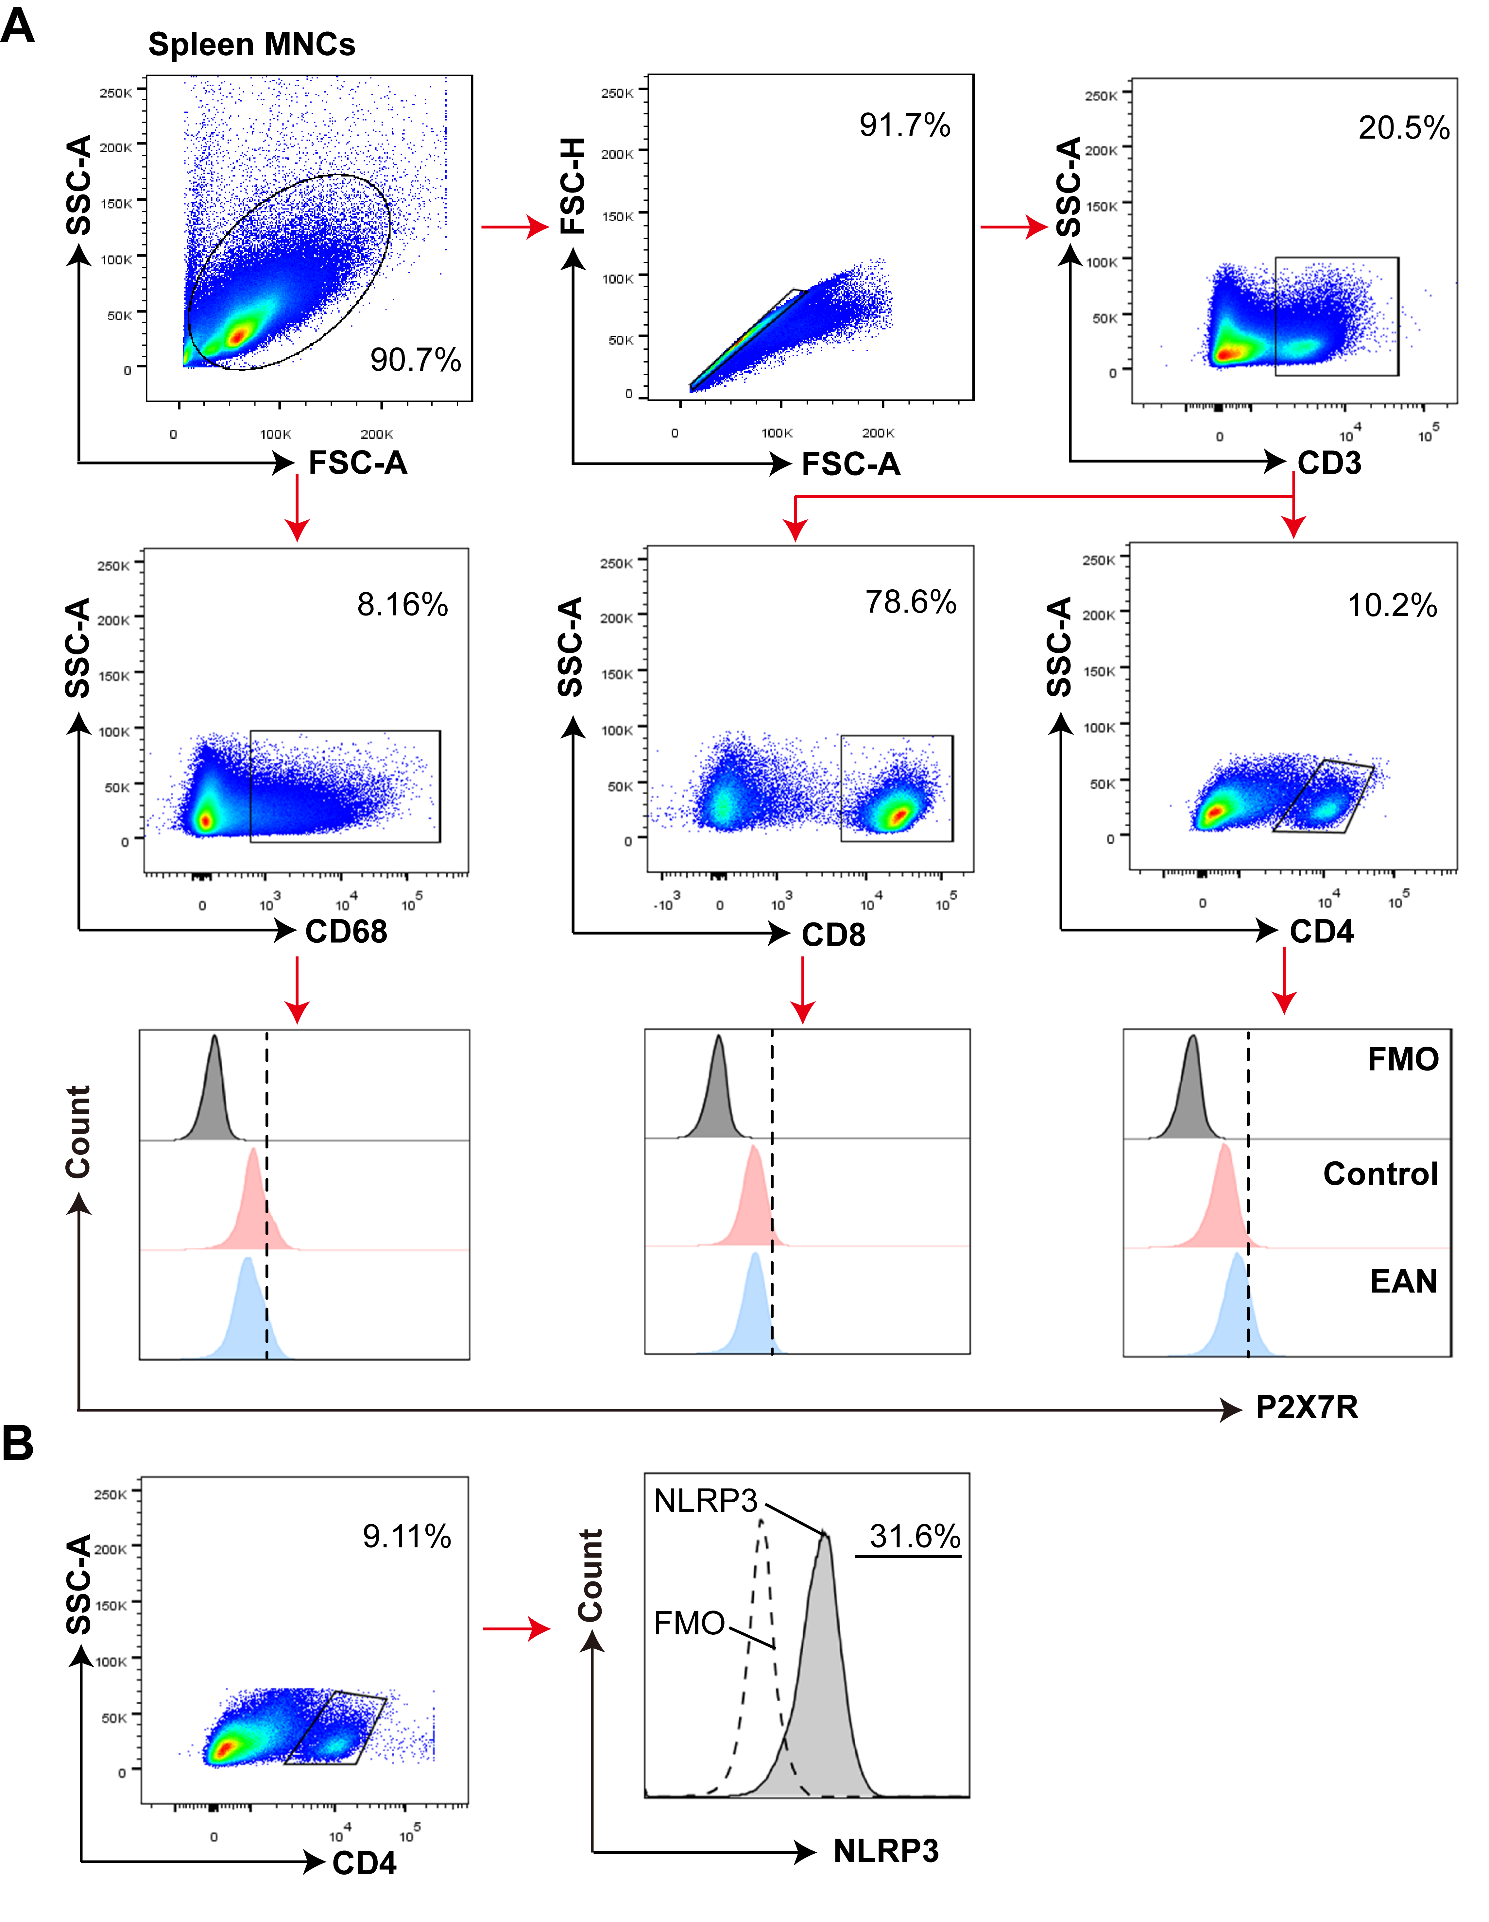


**Figure S4: (A)** Gating strategy of P2X7R in CD4+ T cells, CD8+ T cells and macrophages in splenic MNCs by flow cytometry. **(B)** Gating strategy of NLRP3 in CD4+ T cells in splenic MNCs by flow cytometry. A total of 5*105 cells were measured in each sample using flow cytometry.
